# Supplementary material
Source: Springer Nature journal article supplement (https://www.springermedizin.de/resource/supplementary/12889_2011_4335_MOESM1_ESM.pdf/9491408)

eGFR [ml/min/1.73m<sup>2</sup>]

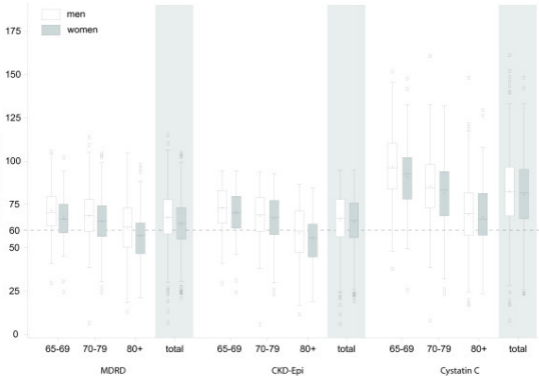

Supplement: MOESM1 [file 9491408]
